# Supplementary material for: Human detection in surveillance videos and its applications - a review
Source: Springer Nature journal article supplement (doi:10.1186/1687-6180-2013-176), 2013-11-22

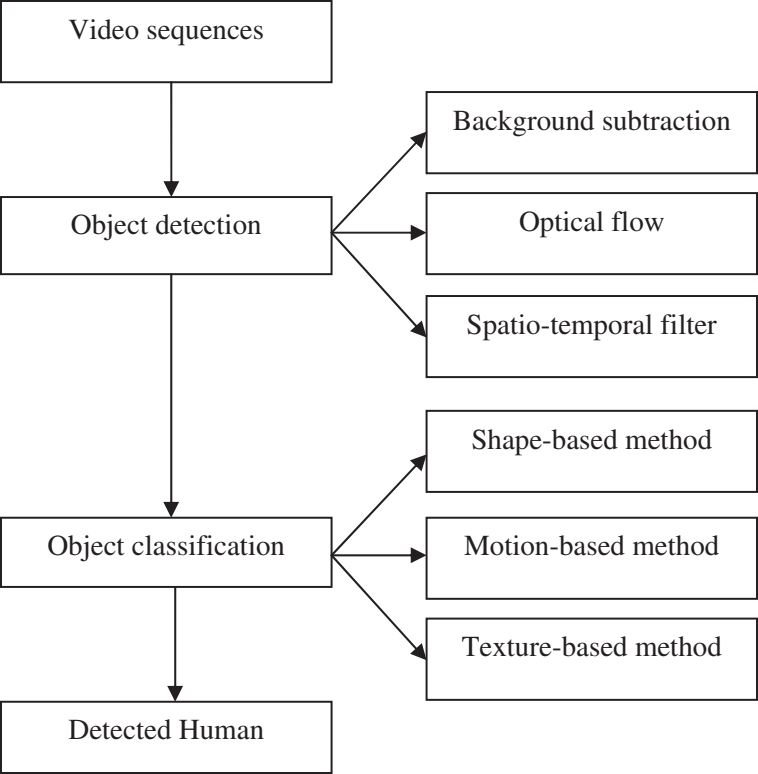

Supplement: 13634_2013_562_MOESM1_ESM.pdf [file 13634_2013_562_MOESM1_ESM.pdf]
